# Supplementary material
Source: publisher figshare collection journal article supplement (https://sage.figshare.com/ndownloader/files/12453935)
Supplement: Supplementary file 1 [file 12453935]

(a) Forearm perturbation

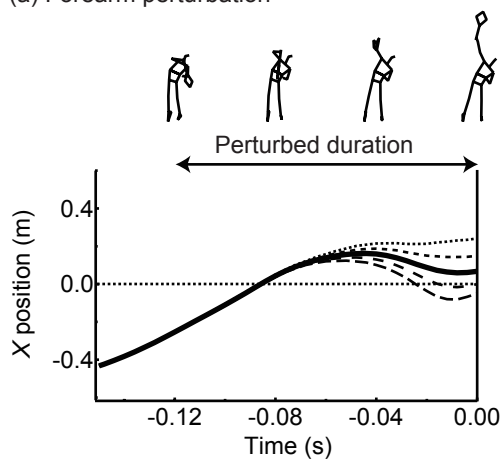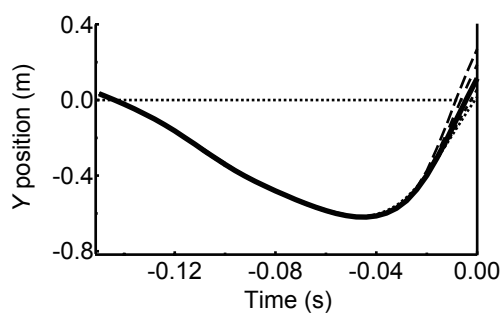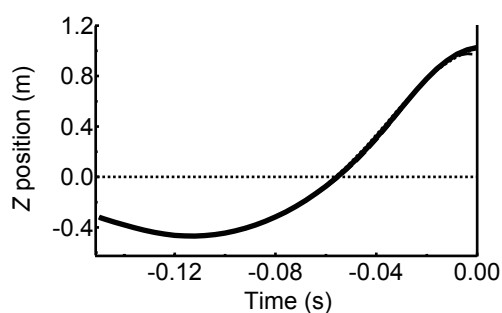

..... : -30%  
 - - - : -15%  
 — :  $\pm 0\%$  (control)  
 - - - : +15%  
 - - - : +30%

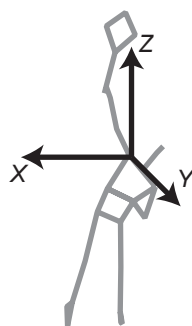

← Right sideline   Baseline   Left sideline →  
 Center mark

(b) Elbow perturbation

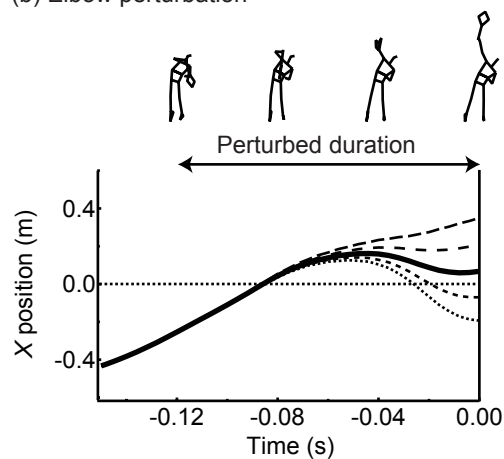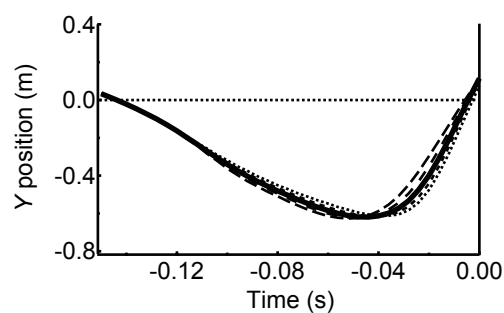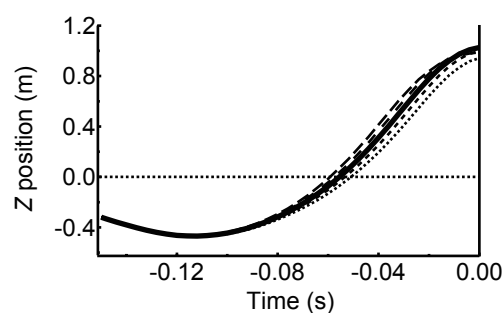

Figure S2. X (top), Y (middle) and Z (bottom) positions of the center of racket head (racket path) for forearm perturbation (a) and elbow perturbation (b). The X-axis directed rightward (from the center mark to the right sideline), Y-axis directed forward (from the baseline to the net), and Z-axis directed vertically on the court of server's side. The shoulder joint center was taken as reference origin.
